# Supplementary material
Source: PubMed Central journal article supplement (PMC4277880)

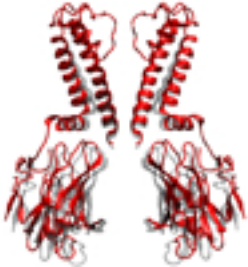

Supplement: NIHMS425479-supplement-1.pdf [file NIHMS425479-supplement-1.pdf]
